# Supplementary material for: Understanding the role of imidazolium-based ionic liquids in the electrochemical CO2 reduction reaction
Source: PubMed Central journal article supplement (PMC10148827; doi:10.1038/s42004-023-00875-9), 2023-04-29
Supplement: 42004_2023_875_MOESM1_ESM.pdf [file 42004_2023_875_MOESM1_ESM.pdf]

# Supporting Information

## Understanding the role of imidazolium-based ionic liquids in the electrochemical CO<sub>2</sub> reduction reaction

Alessia Fortunati<sup>1</sup>, Francesca Risplendi<sup>1,\*</sup>, Michele Re Fiorentin<sup>1</sup>, Giancarlo Cicero<sup>1</sup>, Emmanuele Parisi<sup>1</sup>, Micaela Castellino<sup>1</sup>, Elena Simone<sup>1</sup>, Boyan Iliev<sup>2</sup>, Thomas J.S. Schubert<sup>2</sup>, Nunzio Russo<sup>1</sup>, Simelys Hernández<sup>1,\*</sup>

<sup>1</sup> *Department of Applied Science and Technology, Politecnico di Torino, Corso Duca degli Abruzzi 24, 10129, Turin, Italy*

<sup>2</sup> *Iolitec Ionic Liquids Technologies GmbH, Im Zukunftspark 9, 74076 Heilbronn, German*

*\*Corresponding authors: [simelys.hernandez@polito.it](mailto:simelys.hernandez@polito.it); [francesca.risplendi@polito.it](mailto:francesca.risplendi@polito.it)*

## Table of Contents

|                                                                                                                                                                                                                                                                                                                                                                                                                                                                                                                                                                                                                                                                                                                                                                                                   |    |
|---------------------------------------------------------------------------------------------------------------------------------------------------------------------------------------------------------------------------------------------------------------------------------------------------------------------------------------------------------------------------------------------------------------------------------------------------------------------------------------------------------------------------------------------------------------------------------------------------------------------------------------------------------------------------------------------------------------------------------------------------------------------------------------------------|----|
| Table S1 : Literature data of electrocatalytic CO <sub>2</sub> reduction in ionic liquids using silver as a working electrode. ....                                                                                                                                                                                                                                                                                                                                                                                                                                                                                                                                                                                                                                                               | 4  |
| Figure S1: Scheme of the set-up used for the electrocatalytic CO <sub>2</sub> reduction reaction with the ionic liquid (IL)-based electrolytes. ....                                                                                                                                                                                                                                                                                                                                                                                                                                                                                                                                                                                                                                              | 6  |
| Figure S2: Schematic representation of the K <sup>+</sup> cations transfer from the anodic to the cathodic compartment of the electrochemical cell, occurring when using a high concentration of KOH in the anolyte (e.g. 1M). (Right) Picture of the cathodic chamber evidencing the formation of a precipitate in the IL-based catholyte. ....                                                                                                                                                                                                                                                                                                                                                                                                                                                  | 7  |
| Figure S3: Bipolar membrane mounting scheme in the cell and working mechanism. ....                                                                                                                                                                                                                                                                                                                                                                                                                                                                                                                                                                                                                                                                                                               | 7  |
| Table S2: Experimental conditions of the cyclic voltammetry (CV) test used to measure the electrochemical stability window of the IL-based electrolytes. ....                                                                                                                                                                                                                                                                                                                                                                                                                                                                                                                                                                                                                                     | 7  |
| Figure S4: Potential stability range (cathodic potential) of 0.3M solutions of the six ILs in ACN in N <sub>2</sub> saturated atmosphere, considering a cut-off current density of 1 mA/cm <sup>2</sup> . (A) Cyclic voltammeteries obtained after a screening of CVs done at intervals of increasing cathodic potential, starting from the interval [0; -100mV] and increasing the lower limit until the curve reached a current value in the Y axis equal to -1 mA/cm <sup>2</sup> . That value of current, was chosen as threshold based on previous literature studies. (B) histogram with the resulting cathodic stability windows of the different IL solutions. Catholyte: 0.3M IL in ACN, WE: 3 cm <sup>2</sup> Ag foil, anolyte: 0.1M KOH; CE: Ni Mesh; membrane: bipolar membrane. .... | 8  |
| Figure S5: Fresh catholyte solution (A), tested catholyte solution (B) and H <sub>2</sub> evolution over time (C) measured with a micro-gas chromatograph (GC) during 2h of CP to investigate the [BMIM][SO <sub>3</sub> CF <sub>3</sub> ]-electrolyte reduction in N <sub>2</sub> saturated atmosphere. (D) Potential variation during the CP(2h, 20 mA/cm <sup>2</sup> ). Catholyte: 0.3M [BMIM][SO <sub>3</sub> CF <sub>3</sub> ] in can, WE: 3 cm <sup>2</sup> Ag foil, anolyte: 0.1M KOH; CE: Ni Mesh; membrane: bipolar membrane. ....                                                                                                                                                                                                                                                      | 8  |
| Figure S6: Fresh catholyte solution (A), tested catholyte solution (B) and H <sub>2</sub> evolution over time (C) measured with a micro-GC during 2h of CP to investigate the [BMIM][CO <sub>2</sub> CH <sub>3</sub> ]-electrolyte reduction in N <sub>2</sub> saturated atmosphere. (D) Potential variation during CP(2h, 20 mA/cm <sup>2</sup> ). Catholyte: 0.3M [BMIM][CO <sub>2</sub> CH <sub>3</sub> ] in ACN, WE: 3 cm <sup>2</sup> Ag foil; anolyte: 0.1M KOH, CE: Ni Mesh, membrane: bipolar membrane. ....                                                                                                                                                                                                                                                                              | 9  |
| Figure S7: XRD spectra of Ag foil used as working electrode evidencing the predominant crystalline face: Ag(111), based on the card reference JCPDS No.: 00-004-0783. ....                                                                                                                                                                                                                                                                                                                                                                                                                                                                                                                                                                                                                        | 9  |
| Figure S8: NEB reaction path for BMIM:-CO <sub>2</sub> , EMIM:-CO <sub>2</sub> and EMIM:-Ag(111) reactions. The absence of a transition state shows that these reactions are barrierless. ....                                                                                                                                                                                                                                                                                                                                                                                                                                                                                                                                                                                                    | 10 |
| Figure S9: Cyclic voltammetry curves (CVs) of [EMIM][CO <sub>2</sub> CH <sub>3</sub> ] (A), [BMIM][CO <sub>2</sub> CH <sub>3</sub> ] (B), [BMIM][CO <sub>2</sub> CF <sub>3</sub> ] (C), [BMIM][BF <sub>4</sub> ] (D), [EMIM][SO <sub>3</sub> CF <sub>3</sub> ] (E) and [BMIM][SO <sub>3</sub> CF <sub>3</sub> ] (F) solutions [IL]=0.3M in ACN. Dashed and continuous lines represent CVs in N <sub>2</sub> and CO <sub>2</sub> saturated atmosphere, respectively. Catholyte: 0.3M IL in ACN, WE: 3 cm <sup>2</sup> Ag foil; anolyte: 0.1M KOH, CE: Ni Mesh, membrane: bipolar membrane. ....                                                                                                                                                                                                    | 10 |
| Figure S10: Linear sweep voltammetry (LSV) curves of BMIM-containing ILs (A) and EMIM-containing ILs (B) solutions [IL]=0.3M in ACN. Black line is the blank test in pure ACN without IL. ....                                                                                                                                                                                                                                                                                                                                                                                                                                                                                                                                                                                                    | 11 |
| Figure S11: Chronoamperometries curves registered during 2h test at J=-20 mA/cm <sup>2</sup> . Catholyte: [ILs]=0.3M in ACN, WE: 3 cm <sup>2</sup> Ag foil; anolyte: 0.1M KOH, CE: Ni Mesh, membrane: bipolar membrane. ....                                                                                                                                                                                                                                                                                                                                                                                                                                                                                                                                                                      | 11 |
| Figure S12: Raman spectra showing (A) a comparison between pure ACN (blue line), pure [BMIM][CO <sub>2</sub> CH <sub>3</sub> ] (green line) and the mixed final electrolyte and (B) a comparison between the fresh electrode (dark green line) and the cleaned electrode after test (black line) (B). ....                                                                                                                                                                                                                                                                                                                                                                                                                                                                                        | 12 |
| Figure S13: FESEM images of the fresh Ag electrode: (A) before the test, (B) after the electrochemical tests in 0.3M [BMIM][SO <sub>3</sub> CF <sub>3</sub> ] solution in ACN, including CVs, LSVs and CP at -20 mA for 2h, and (C) after the                                                                                                                                                                                                                                                                                                                                                                                                                                                                                                                                                     |    |

electrochemical test and cleaning of the electrode by rinsing it with pure ACN. EDX analysis are reported in Table S3 . ..... 12

Table S3: EDX data of Ag electrode just after the electrochemical tests (Figure S13-B), including CVs, LSVs and CP at -20 mA for 2h, in comparison with the Ag electrode after testing and cleaning it with ACN Figure S 13-C)..... 12

Figure S15: Raman spectra showing a comparison between Ag foil after test in [1-Butyl-2,3-Methyl imidazole acetate]=0.3M in ACN (purple line) and the same electrode cleaned by rinsing it with acetonitrile (black line). In addition to the peaks assigned and reported in Table 2, the post-test electrode spectrum shows peaks at 2925 and 2865  $\text{cm}^{-1}$ , which are characteristic of the  $-\text{CH}_3$  group attached to a ring..... 14

**Table S1** : Literature data of electrocatalytic CO<sub>2</sub> reduction in ionic liquids using silver as a working electrode.

| Electrode | Product (Faradaic efficiency, %)                             | Electrolyte                                                                                                      | Current density, mA/cm <sup>2</sup>    | Reference                  |
|-----------|--------------------------------------------------------------|------------------------------------------------------------------------------------------------------------------|----------------------------------------|----------------------------|
| Ag        | Dimethyl carbonate (74)                                      | Bare [BMIM][BF <sub>4</sub> ]                                                                                    | charge passed, 1.0 F.mol <sup>-1</sup> | Zhang et al., 2008         |
| Ag        | CO (96)                                                      | 18% [EMIM][BF <sub>4</sub> ] in water                                                                            | n/a                                    | Rosen et al., 2011         |
| Ag        | HCO <sub>2</sub> <sup>-</sup> (95)                           | [P66614][124Triz] in Acetonitrile + water                                                                        | Charge (10 C)                          | Hollingsworth et al., 2015 |
| Ag        | HCO <sub>2</sub> <sup>-</sup> (6) CO (6) H <sub>2</sub> (41) | 0.1 mol dm <sup>-3</sup> [P66614][124Triz] in ACN + 0.7 mol dm <sup>-3</sup> of water                            | Charge (10 C)                          | Hollingsworth et al., 2015 |
| Ag        | n/a                                                          | Bare [PMIM][NTf <sub>2</sub> ]                                                                                   | -0.7                                   | Tanner et al., 2016        |
| Ag        | n/a                                                          | Bare [EMIM][NTf <sub>2</sub> ]                                                                                   | -1.5                                   | Tanner et al., 2016        |
| Ag        | n/a                                                          | Bare [BMIM][NTf <sub>2</sub> ]                                                                                   | -1.60                                  | Tanner et al., 2016        |
| Ag        | n/a                                                          | Bare [BMIM][BF <sub>4</sub> ]                                                                                    | -0.8                                   | Tanner et al., 2016        |
| Ag        | n/a                                                          | 0.1 M [Bu <sub>4</sub> N][PF <sub>6</sub> ] + 0.02 M [Ethyl 2-Methyl Imidazolium][BF <sub>4</sub> ]              | -10.0                                  | Lau et al., 2016           |
| Ag        | n/a                                                          | 0.1 M [Bu <sub>4</sub> N][PF <sub>6</sub> ] + 0.02 M [Ethyl 2,3-dimethyl Imimidazolium][BF <sub>4</sub> ]        | -16.0                                  | Lau et al., 2016           |
| Ag        | n/a                                                          | 0.1 M [Bu <sub>4</sub> N][PF <sub>6</sub> ] + 0.02 M [Ethyl 2,3,4,5-tetramethyl Imimidazolium][BF <sub>4</sub> ] | -5.5                                   | Lau et al., 2016           |
| Ag        | CO (90)                                                      | [Bmim][CF <sub>3</sub> SO <sub>3</sub> ]/ Propylene carbonate                                                    | -4.6                                   | Shi et al., 2014           |

|    |                                 |                                                                                                                      |      |                               |
|----|---------------------------------|----------------------------------------------------------------------------------------------------------------------|------|-------------------------------|
| Ag | Formate (95)                    | 0.1 M [P66614][124Triz]<br>/Acetonitrile                                                                             | n/a  | Hollingsworth<br>et al., 2015 |
| Ag | CO (95.8)                       | [BMIm][Cl] in ethylene<br>glycol (1:2)                                                                               | n/a  | Vasilyev, D.V et<br>al., 2019 |
| Ag | CO                              | 75 mM<br>H <sub>2</sub> O/[Emim]BF <sub>4</sub>                                                                      | -4   | Salehi-Khojin et<br>al., 2013 |
| Ag | HCOOH (63)                      | 0.1 mol L <sup>-1</sup> [P66614]<br>124Triz/acetonitrile                                                             | n/a  | Hollingsworth<br>et al., 2015 |
| Ag | CO (100)                        | 0.02 M 1,3-dimethyl-2-<br>phenyl-imidazolium<br>tetrafluoroborate/0.1 M<br>TBAPF <sub>6</sub> /7 mL<br>acetonitrile  | -4.2 | Lau et al., 2016              |
| Ag | CO (95.6+/-6-.8)                | 50 mol % [Emim]TFO+<br>KHCO <sub>3</sub> /H <sub>2</sub> O                                                           | -10  | Neubauer et al.,<br>2016      |
| Ag | CO(70.4)                        | 0.1 M n-Bu <sub>4</sub> NPF <sub>6</sub> / 2.0<br>mM [C10mim]BF <sub>4</sub> +<br>1.0% H <sub>2</sub> O/acetonitrile | n/a  | Zhao et al.,<br>2016          |
| Ag | CO (90)                         | [Bmim]BF <sub>4</sub> /H <sub>2</sub> O<br>(<70%)                                                                    | -1   | Rudnev et al.,<br>2017        |
| Ag | CO (94)                         | [Bmim]BF <sub>4</sub> /20% H <sub>2</sub> O                                                                          | n/a  | Rudnev et al.,<br>2017        |
| Ag | CO (100)                        | 1 M [EmimOH]Cl/2 M<br>Ethylene<br>Glycol/Propylene<br>carbonate                                                      | -4   | Vasilyev et al.,<br>2019      |
| Ag | CO (80)<br>H <sub>2</sub> (17)  | [BMIM][BF <sub>4</sub> ]=0.3M in<br>Acetonitrile                                                                     | -20  | This work                     |
| Ag | CO (75)<br>H <sub>2</sub> (10)  | [BMIM][CO <sub>2</sub> CF <sub>3</sub> ]=0.3M<br>in Acetonitrile                                                     | -20  | This work                     |
| Ag | CO (20)<br>H <sub>2</sub> (80)  | [BMIM][CO <sub>2</sub> CH <sub>3</sub> ]=0.3M<br>in Acetonitrile                                                     | -20  | This work                     |
| Ag | CO (90)<br>H <sub>2</sub> (5)   | [EMIM][CO <sub>2</sub> CH <sub>3</sub> ]=0.3M<br>in Acetonitrile                                                     | -20  | This work                     |
| Ag | CO (97)<br>H <sub>2</sub> (2)   | [BMIM][SO <sub>3</sub> CF <sub>3</sub> ]=0.3M<br>in Acetonitrile                                                     | -20  | This work                     |
| Ag | CO (95)<br>H <sub>2</sub> (3)   | [EMIM][SO <sub>3</sub> CF <sub>3</sub> ]=0.3M<br>in Acetonitrile                                                     | -20  | This work                     |
| Ag | CO (93)<br>H <sub>2</sub> (2.4) | [BMIM][BF <sub>4</sub> ]=0.3M in<br>Acetonitrile                                                                     | -10  | This work                     |
| Ag | CO (96)<br>H <sub>2</sub> (3.2) | [BMIM][CO <sub>2</sub> CF <sub>3</sub> ]=0.3M<br>in Acetonitrile                                                     | -10  | This work                     |

|    |                                 |                                                                  |     |           |
|----|---------------------------------|------------------------------------------------------------------|-----|-----------|
| Ag | CO (12)<br>H <sub>2</sub> (85)  | [BMIM][CO <sub>2</sub> CH <sub>3</sub> ]=0.3M<br>in Acetonitrile | -10 | This work |
| Ag | CO (10)<br>H <sub>2</sub> (85)  | [EMIM][CO <sub>2</sub> CH <sub>3</sub> ]=0.3M<br>in Acetonitrile | -10 | This work |
| Ag | CO (95)<br>H <sub>2</sub> (0.3) | [BMIM][SO <sub>3</sub> CF <sub>3</sub> ]=0.3M<br>in Acetonitrile | -10 | This work |
| Ag | CO (85)<br>H <sub>2</sub> (1.5) | [EMIM][SO <sub>3</sub> CF <sub>3</sub> ]=0.3M<br>in Acetonitrile | -10 | This work |
| Ag | CO (92)<br>H <sub>2</sub> (6)   | [BMIM][BF <sub>4</sub> ]=0.3M in<br>Acetonitrile                 | -5  | This work |
| Ag | CO (98)<br>H <sub>2</sub> (0.4) | [BMIM][CO <sub>2</sub> CF <sub>3</sub> ]=0.3M<br>in Acetonitrile | -5  | This work |
| Ag | CO (70)<br>H <sub>2</sub> (20)  | [BMIM][CO <sub>2</sub> CH <sub>3</sub> ]=0.3M<br>in Acetonitrile | -5  | This work |
| Ag | CO (17)<br>H <sub>2</sub> (75)  | [EMIM][CO <sub>2</sub> CH <sub>3</sub> ]=0.3M<br>in Acetonitrile | -5  | This work |
| Ag | CO (98)<br>H <sub>2</sub> (0.7) | [BMIM][SO <sub>3</sub> CF <sub>3</sub> ]=0.3M<br>in Acetonitrile | -5  | This work |
| Ag | CO (89)<br>H <sub>2</sub> (1.9) | [EMIM][SO <sub>3</sub> CF <sub>3</sub> ]=0.3M<br>in Acetonitrile | -5  | This work |

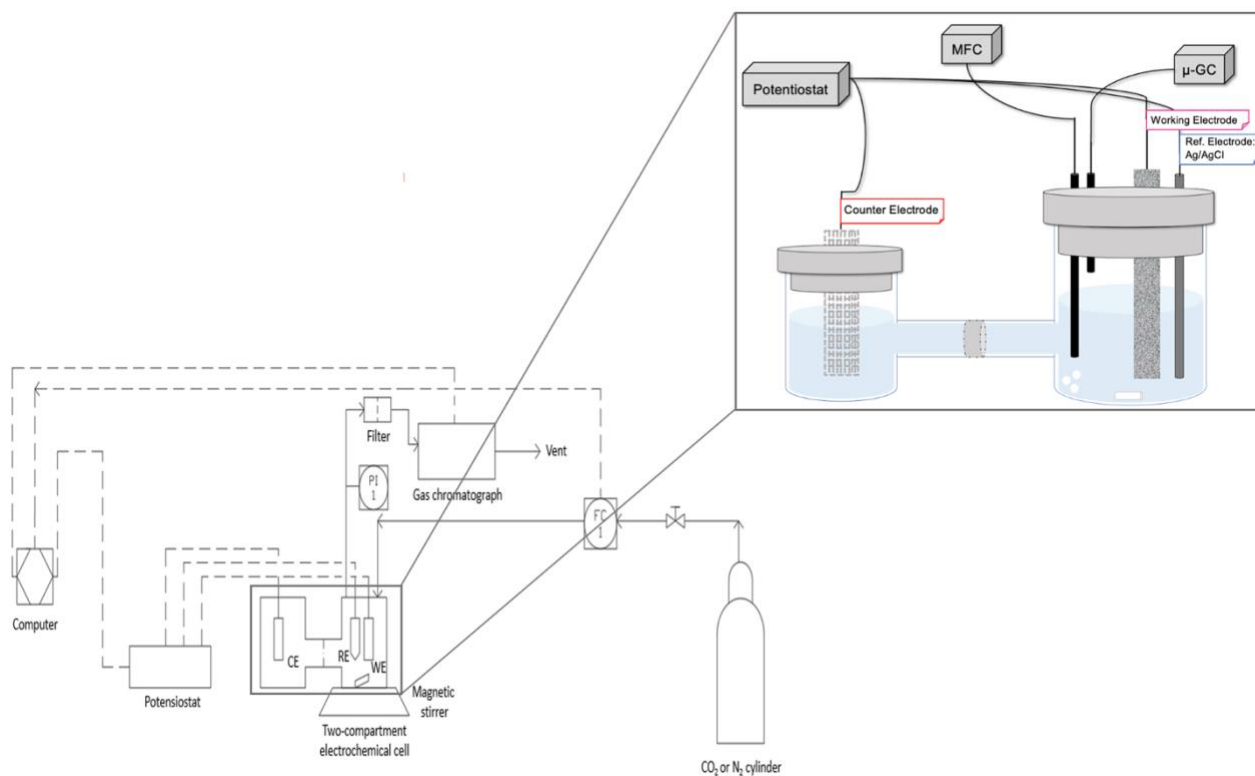

**Figure S1:** Scheme of the set-up used for the electrocatalytic CO<sub>2</sub> reduction reaction with the ionic liquid (IL)-based electrolytes.

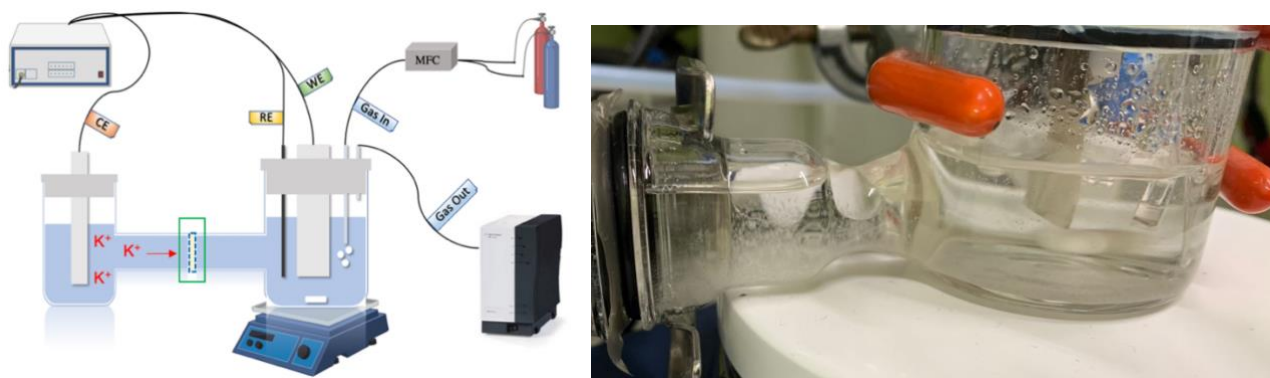

**Figure S2:** Schematic representation of the  $K^+$  cations transfer from the anodic to the cathodic compartment of the electrochemical cell, occurring when using a high concentration of KOH in the anolyte (e.g. 1M). (Right) Picture of the cathodic chamber evidencing the formation of a precipitate in the IL-based catholyte.

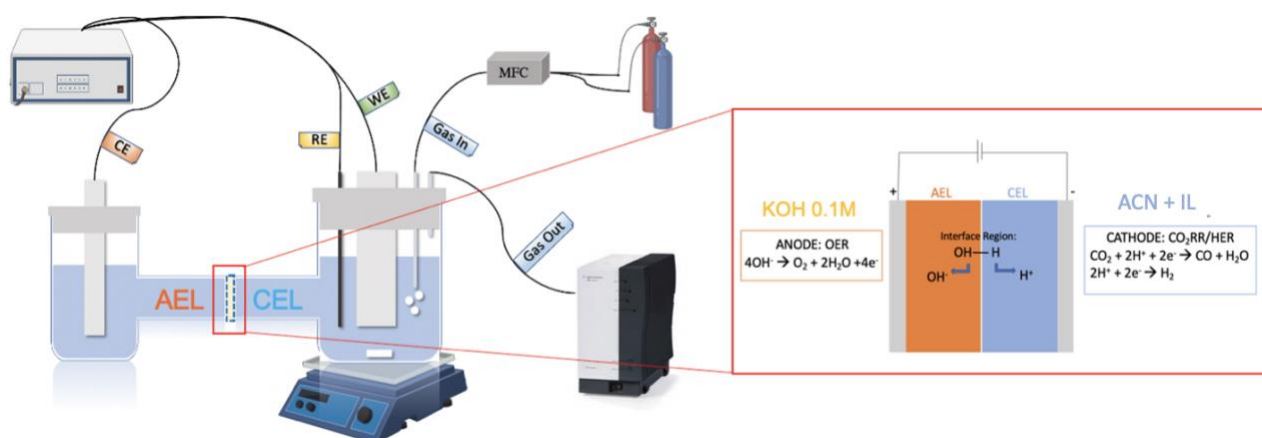

**Figure S3:** Bipolar membrane mounting scheme in the cell and working mechanism.

**Table S2:** Experimental conditions of the cyclic voltammetry (CV) test used to measure the electrochemical stability window of the IL-based electrolytes.

| Parameter                | Value                                       |
|--------------------------|---------------------------------------------|
| Temperature              | 298.15 K                                    |
| Pressure                 | 1 atm                                       |
| Catholyte solution       | 0.3M IL (see Table 1) in acetonitrile (ACN) |
| Anolyte solution         | 0.1M KOH in H <sub>2</sub> O                |
| Scanning rate            | 30 mVs <sup>-1</sup>                        |
| Working Electrode (WE)   | Silver foil (3 cm <sup>2</sup> )            |
| Counter Electrode (CE)   | Nickel mesh                                 |
| Reference Electrode (RE) | Ag/AgCl in sat. KCl                         |

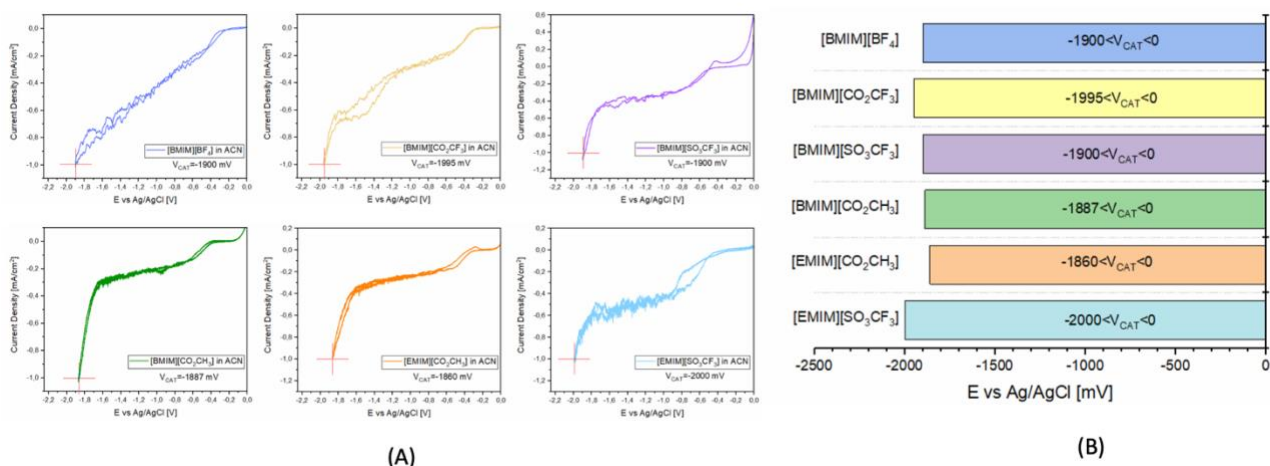

**Figure S4:** Potential stability range (cathodic potential) of 0.3M solutions of the six ILs in ACN in N<sub>2</sub> saturated atmosphere, considering a cut-off current density of 1 mA/cm<sup>2</sup>. (A) Cyclic voltammograms obtained after a screening of CVs done at intervals of increasing cathodic potential, starting from the interval [0; -100mV] and increasing the lower limit until the curve reached a current value in the Y axis equal to -1 mA/cm<sup>2</sup>. That value of current, was chosen as threshold based on previous literature studies. (B) histogram with the resulting cathodic stability windows of the different IL solutions. Catholyte: 0.3M IL in ACN, WE: 3 cm<sup>2</sup> Ag foil, anolyte: 0.1M KOH; CE: Ni Mesh; membrane: bipolar membrane.

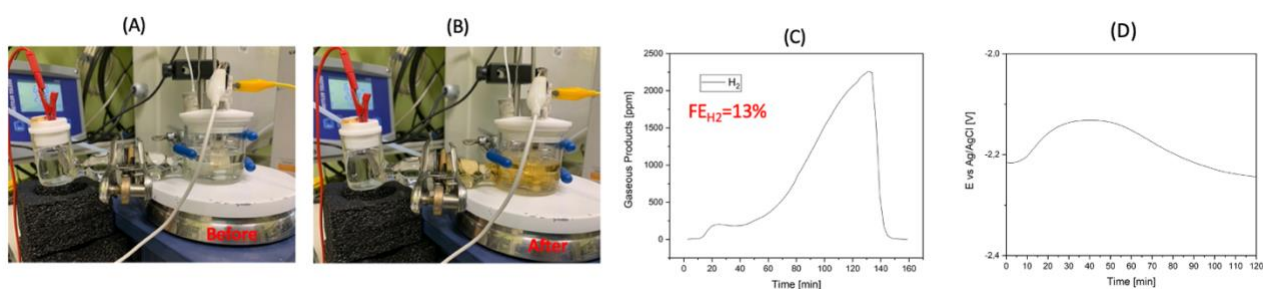

**Figure S5:** Fresh catholyte solution (A), tested catholyte solution (B) and H<sub>2</sub> evolution over time (C) measured with a micro-gas chromatograph (GC) during 2h of CP to investigate the [BMIM][SO<sub>3</sub>CF<sub>3</sub>]-electrolyte reduction in N<sub>2</sub> saturated atmosphere. (D) Potential variation during the CP(2h, 20 mA/cm<sup>2</sup>). Catholyte: 0.3M [BMIM][SO<sub>3</sub>CF<sub>3</sub>] in can, WE: 3 cm<sup>2</sup> Ag foil, anolyte: 0.1M KOH; CE: Ni Mesh; membrane: bipolar membrane.



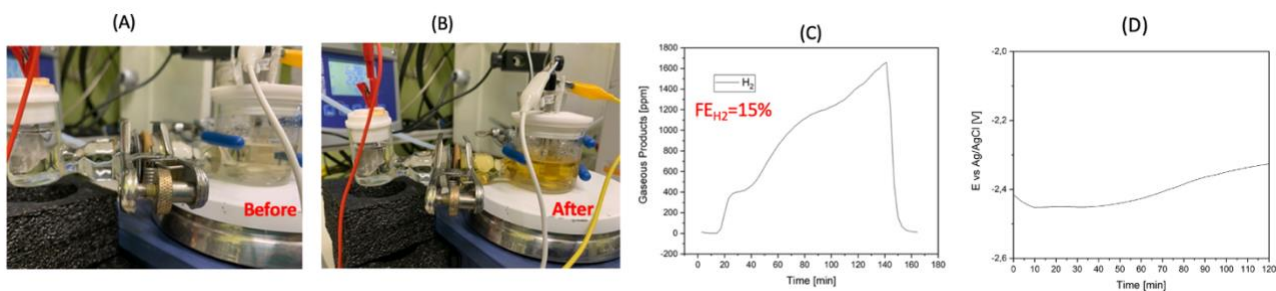

**Figure S6:** Fresh catholyte solution (A), tested catholyte solution (B) and H<sub>2</sub> evolution over time (C) measured with a micro-GC during 2h of CP to investigate the [BMIM][CO<sub>2</sub>CH<sub>3</sub>]-electrolyte reduction in N<sub>2</sub> saturated atmosphere. (D) Potential variation during CP(2h, 20 mA/cm<sup>2</sup>). Catholyte: 0.3M [BMIM][CO<sub>2</sub>CH<sub>3</sub>] in ACN, WE: 3 cm<sup>2</sup> Ag foil; anolyte: 0.1M KOH, CE: Ni Mesh, membrane: bipolar membrane.

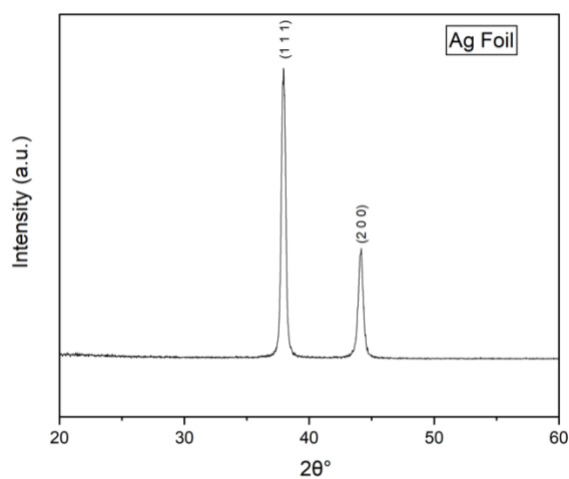

**Figure S7:** XRD spectra of Ag foil used as working electrode evidencing the predominant crystalline face: Ag(111), based on the card reference JCPDS No.: 00-004-0783.

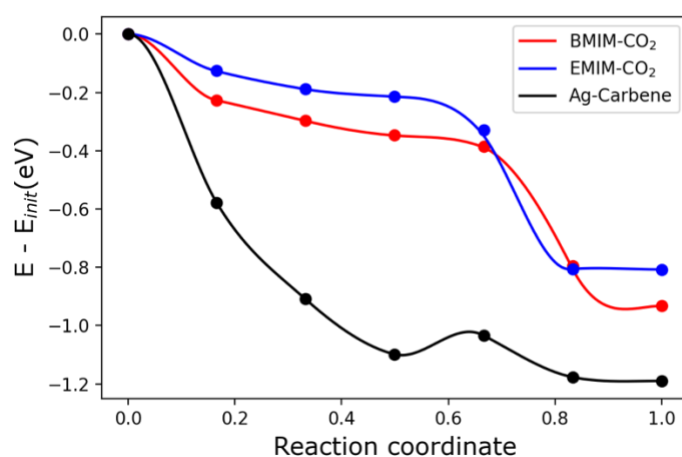

**Figure S8:** NEB reaction path for BMIM:-CO<sub>2</sub>, EMIM:-CO<sub>2</sub> and EMIM:-Ag(111) reactions. The absence of a transition state shows that these reactions are barrierless.

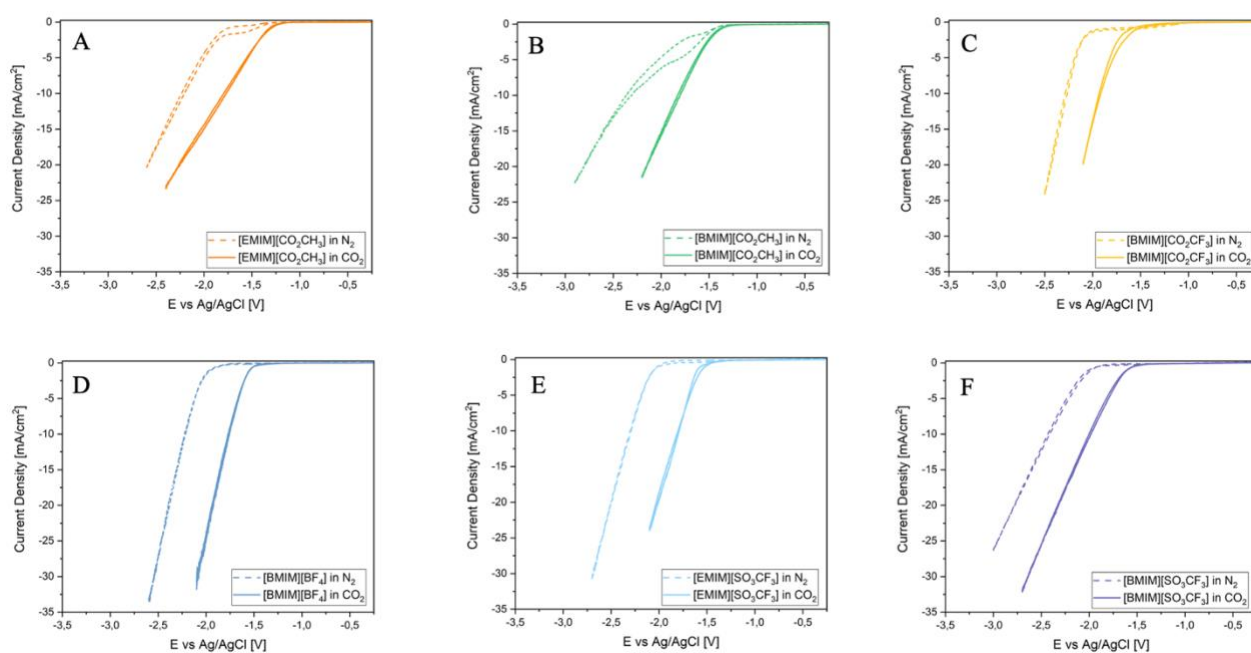

**Figure S9:** Cyclic voltammetry curves (CVs) of [EMIM][CO<sub>2</sub>CH<sub>3</sub>] (A), [BMIM][CO<sub>2</sub>CH<sub>3</sub>] (B), [BMIM][CO<sub>2</sub>CF<sub>3</sub>] (C), [BMIM][BF<sub>4</sub>] (D), [EMIM][SO<sub>3</sub>CF<sub>3</sub>] (E) and [BMIM][SO<sub>3</sub>CF<sub>3</sub>] (F) solutions [IL]=0.3M in ACN. Dashed and continuous lines represent CVs in N<sub>2</sub> and CO<sub>2</sub> saturated atmosphere, respectively. Catholyte: 0.3M IL in ACN, WE: 3 cm<sup>2</sup> Ag foil; anolyte: 0.1M KOH, CE: Ni Mesh, membrane: bipolar membrane.

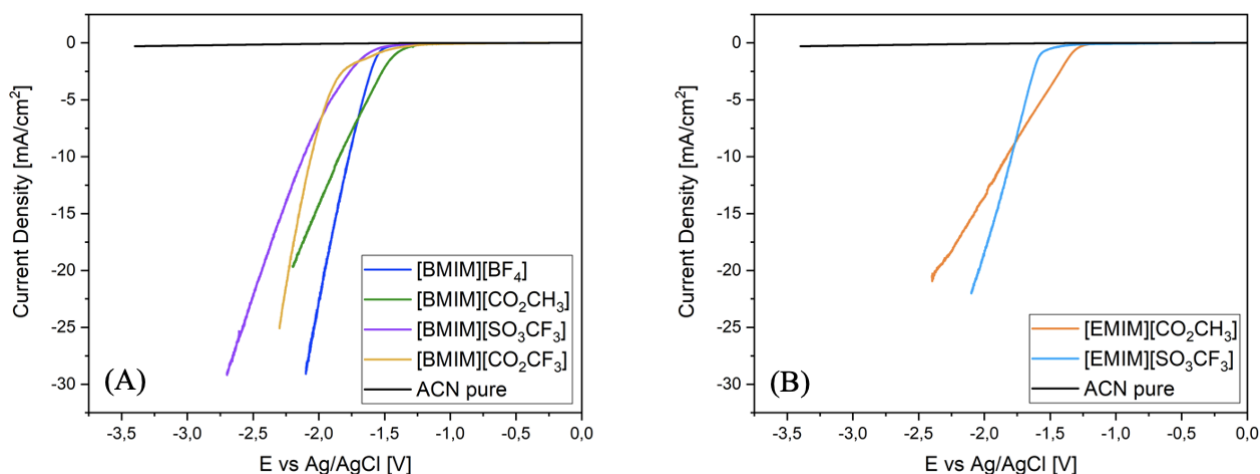

**Figure S10:** Linear sweep voltammetry (LSV) curves of BMIM-containing ILs (A) and EMIM-containing ILs (B) solutions  $[IL]=0.3M$  in ACN. Black line is the blank test in pure ACN without IL.

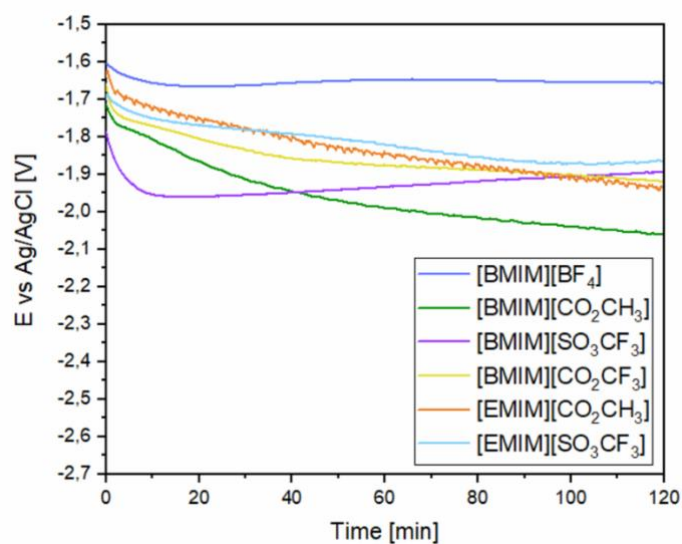

**Figure S11:** Chronoamperometries curves registered during 2h test at  $J=-20 \text{ mA/cm}^2$ . Catholyte:  $[ILs]=0.3M$  in ACN, WE:  $3 \text{ cm}^2$  Ag foil; anolyte:  $0.1M \text{ KOH}$ , CE: Ni Mesh, membrane: bipolar membrane.

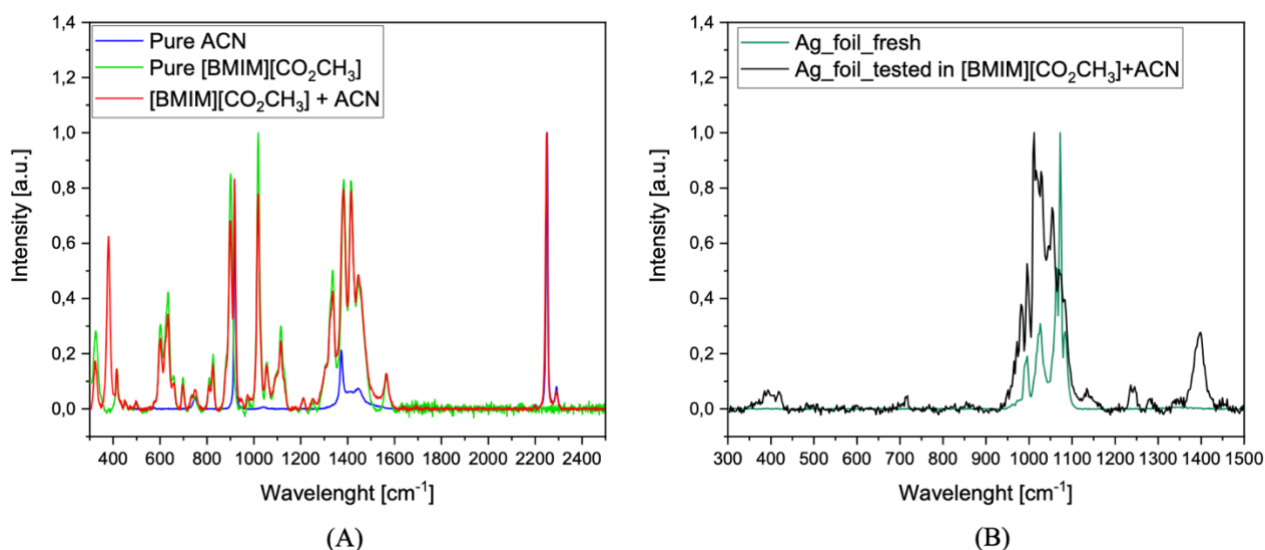

**Figure S12:** Raman spectra showing (A) a comparison between pure ACN (blue line), pure [BMIM][CO<sub>2</sub>CH<sub>3</sub>] (green line) and the mixed final electrolyte and (B) a comparison between the fresh electrode (dark green line) and the cleaned electrode after test (black line) (B).

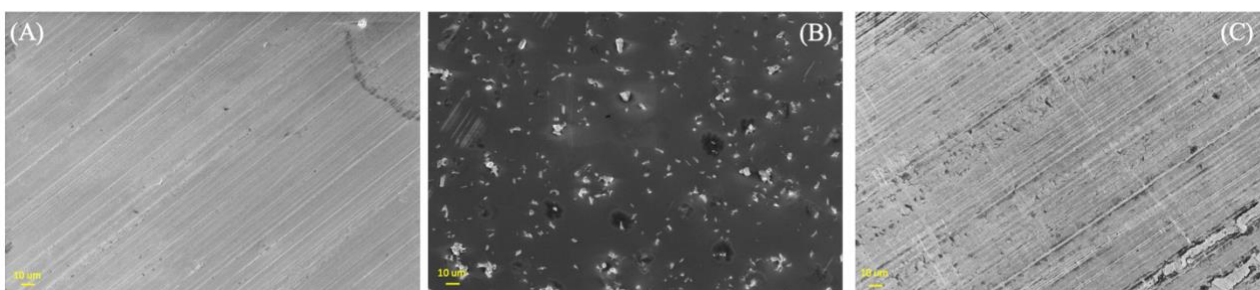

**Figure S13:** FESEM images of the fresh Ag electrode: (A) before the test, (B) after the electrochemical tests in 0.3M [BMIM][SO<sub>3</sub>CF<sub>3</sub>] solution in ACN, including CVs, LSVs and CP at -20 mA for 2h, and (C) after the electrochemical test and cleaning of the electrode by rinsing it with pure ACN. EDX analysis are reported in **Table S3**.

**Table S3:** EDX data of Ag electrode just after the electrochemical tests (Figure S13-B), including CVs, LSVs and CP at -20 mA for 2h, in comparison with the Ag electrode after testing and cleaning it with ACN **Figure S13-C**.

| Elements | Ag_tested (Atomic%) | Ag_tested_cleaned (Atomic %) |
|----------|---------------------|------------------------------|
| C        | 23.56               | 0                            |
| O        | 32.22               | 0                            |
| F        | 24.88               | 0                            |
| S        | 2.90                | 0                            |
| K        | 2.16                | 0                            |
| Ag       | 14.28               | 100                          |

The electrode was tested with [BMIM][SO<sub>3</sub>CF<sub>3</sub>] (Figure S13-B) and EDX analysis evidenced the presence of: S and F, characteristic elements of the anion; C and O belonged to the IL cation or to the solvent; Ag from electrode surface and K due to anolyte crossover through the membrane. To conclude, on electrode just tested and not cleaned the authors found the presence of the anion on the electrode surface. Then, the electrode after test and EDX analysis was rinsed with ACN, in order to remove any residue from the surface and analyze any pure surface reconstruction. EDX analysis performed on cleaned tested electrode (Table S3) did not show anion traces on electrode surface.

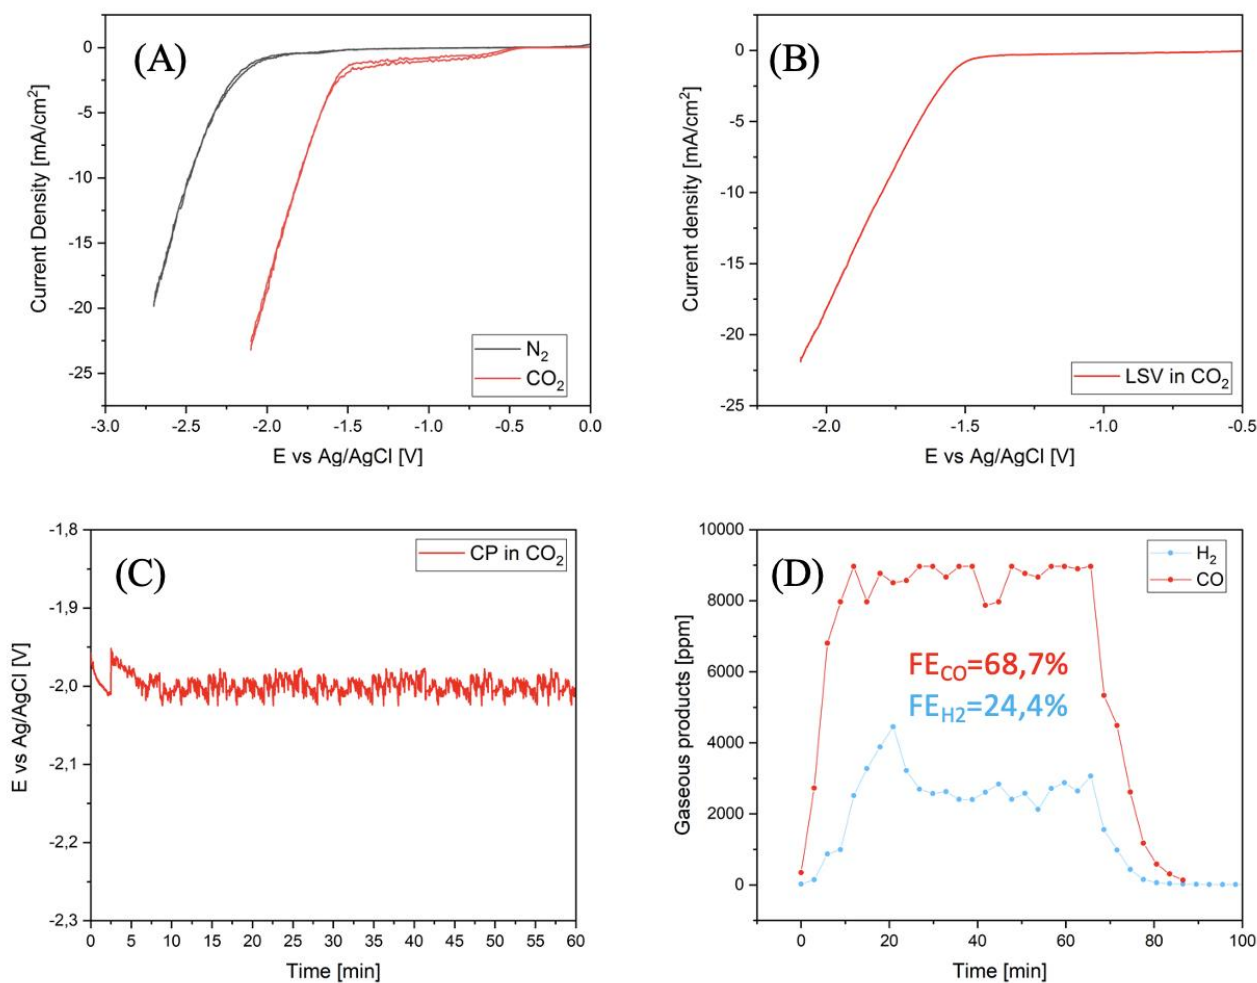

**Figure S14:** Results of electrochemical test in an H-type cell with 1-Butyl-2,3-Methyl Imidazole acetate as electrolyte, [IL]=0.3M in ACN. (A) Cyclic voltammetry in  $N_2$  and  $CO_2$ ; (B) LSV in  $CO_2$ ; (C) CP for 1h at  $I=-20mA$  in  $CO_2$ ; (D) Gaseous products concentration measured by a micro-GC during the CP test.

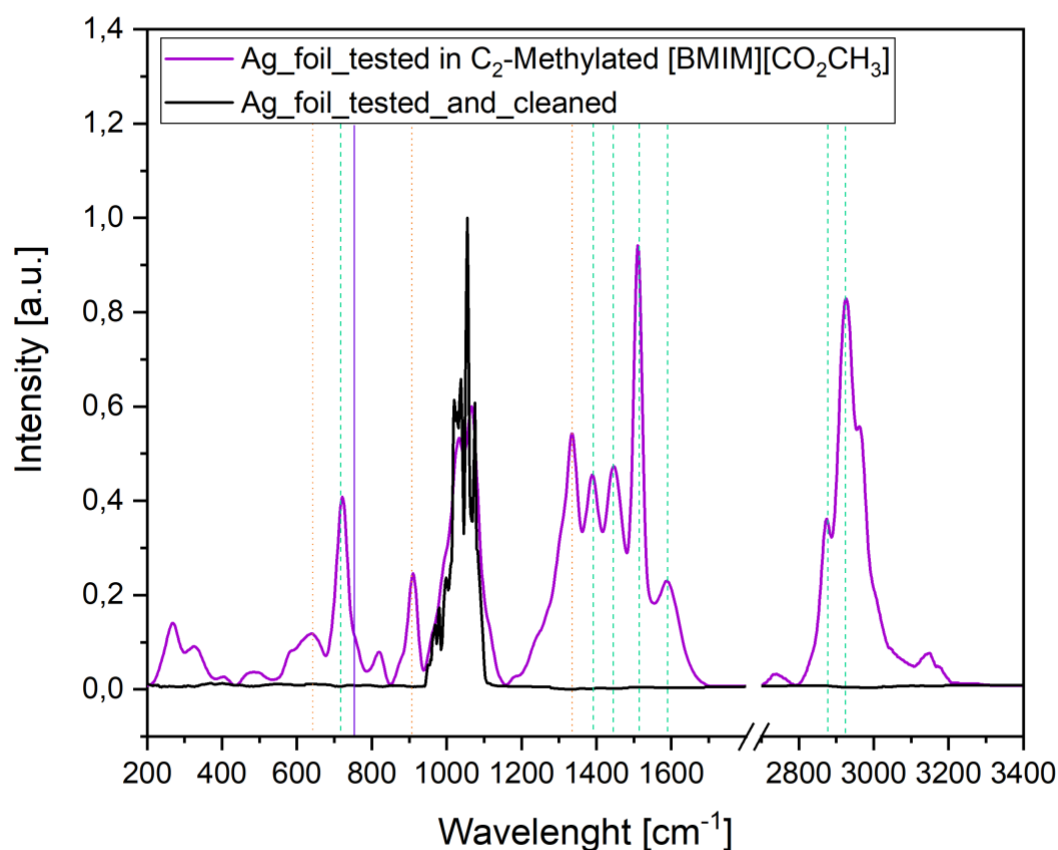

**Figure S15:** Raman spectra showing a comparison between Ag foil after test in [1-Butyl-2,3-Methyl imidazole acetate]=0.3M in ACN (purple line) and the same electrode cleaned by rinsing it with acetonitrile (black line). In addition to the peaks assigned and reported in Table 2, the post-test electrode spectrum shows peaks at 2925 and 2865  $\text{cm}^{-1}$ , which are characteristic of the  $-\text{CH}_3$  group attached to a ring. Vertical lines mark intensity peaks related to acetate anion (dot orange line), BMIM cation (dashed green line) and finally ACN (solid purple line).
